# Supplementary material for: The orphan nuclear receptor NR4A2 is part of a p53–microRNA-34 network
Source: PubMed Central journal article supplement (PMC4848494; doi:10.1038/srep25108), 2016-04-28
Supplement: srep25108-s1.pdf [file srep25108-s1.pdf]

Supplementary Information for

**The orphan nuclear receptor NR4A2 is part of a p53–microRNA-34 network**

Jordan A. Beard<sup>1,2</sup>, Alexa Tenga<sup>1,2</sup>, Justin Hills<sup>1</sup>, Jessica D. Hoyer<sup>1,2</sup>, Milu T. Cherian<sup>1</sup>, Yong-Dong Wang<sup>3</sup>, & Taosheng Chen<sup>1,2\*</sup>

<sup>1</sup>Department of Chemical Biology & Therapeutics, St. Jude Children's Research Hospital, Memphis, Tennessee, USA.

<sup>2</sup>Integrated Biomedical Sciences Program, University of Tennessee Health Science Center, Memphis, Tennessee, USA.

<sup>3</sup>Department of Computational Biology, St. Jude Children's Research Hospital, Memphis, Tennessee, USA.

**\*Corresponding author:** Taosheng Chen, Department of Chemical Biology & Therapeutics, St. Jude Children's Research Hospital, 262 Danny Thomas Pl., MS 1000, Memphis, TN 38105, USA. Email: taosheng.chen@stjude.org; Tel.: +1-901-595-5937; Fax: +1-901-595-5715

**Supplementary Table S1. List of miRNAs screened.**

| <b>miRNA ID</b> | <b>mirBase v14.0<br/>Accession #</b> | <b>Log2 fold<br/>change</b> | <b>Std.<br/>dev.</b> | <b>P-value</b> | <b>Significance</b> |
|-----------------|--------------------------------------|-----------------------------|----------------------|----------------|---------------------|
| hsa-miR-335     | MIMAT0000765                         | -0.475                      | 0.0223               | < 0.0001       | ****                |
| hsa-miR-34c     | MIMAT0000686                         | -0.475                      | 0.1028               | < 0.0001       | ****                |
| hsa-miR-144     | MIMAT0000436                         | -0.444                      | 0.0696               | < 0.0001       | ****                |
| hsa-miR-214     | MIMAT0000271                         | -0.379                      | 0.0942               | 0.0002         | ***                 |
| hsa-miR-191     | MIMAT0000440                         | -0.371                      | 0.1471               | 0.0002         | ***                 |
| hsa-miR-15a     | MIMAT0000068                         | -0.362                      | 0.0343               | 0.0004         | ***                 |
| hsa-miR-155     | MIMAT0000646                         | -0.361                      | 0.0926               | 0.0004         | ***                 |
| hsa-miR-20a     | MIMAT0000075                         | -0.355                      | 0.0296               | 0.0005         | ***                 |
| hsa-miR-25      | MIMAT0000081                         | -0.352                      | 0.128                | 0.0006         | ***                 |
| hsa-miR-122     | MIMAT0000421                         | -0.348                      | 0.0902               | 0.0007         | ***                 |
| hsa-miR-140     | MIMAT0000431                         | -0.333                      | 0.015                | 0.0016         | **                  |
| hsa-miR-17      | MIMAT0000070                         | -0.325                      | 0.0957               | 0.0024         | **                  |
| hsa-let-7b      | MIMAT0000063                         | -0.314                      | 0.0205               | 0.0039         | **                  |
| hsa-miR-363     | MIMAT0000707                         | -0.303                      | 0.1958               | 0.0066         | **                  |
| hsa-miR-218     | MIMAT0000275                         | -0.297                      | 0.0494               | 0.0085         | **                  |
| hsa-miR-9       | MIMAT0000441                         | -0.297                      | 0.0711               | 0.0086         | **                  |
| hsa-miR-132     | MIMAT0000426                         | -0.297                      | 0.1684               | 0.0086         | **                  |
| hsa-miR-21      | MIMAT0000076                         | -0.274                      | 0.0699               | 0.0224         | *                   |
| hsa-miR-184     | MIMAT0000454                         | -0.268                      | 0.0717               | 0.0289         | *                   |
| hsa-miR-32      | MIMAT0000090                         | -0.266                      | 0.0533               | 0.0317         | *                   |
| hsa-miR-148a    | MIMAT0000243                         | -0.251                      | 0.1481               | 0.0553         | ns                  |
| hsa-miR-10b     | MIMAT0000254                         | -0.237                      | 0.0745               | 0.0892         | ns                  |

|              |              |        |        |        |    |
|--------------|--------------|--------|--------|--------|----|
| hsa-miR-30c  | MIMAT0000244 | -0.228 | 0.138  | 0.1213 | ns |
| hsa-miR-210  | MIMAT0000267 | -0.213 | 0.0814 | 0.1895 | ns |
| hsa-miR-128b | MIMAT0031095 | -0.203 | 0.0917 | 0.2513 | ns |
| hsa-miR-92a  | MIMAT0000092 | -0.199 | 0.0536 | 0.2774 | ns |
| hsa-miR-133b | MIMAT0000770 | -0.195 | 0.1246 | 0.3096 | ns |
| hsa-miR-143  | MIMAT0000435 | -0.184 | 0.1607 | 0.3967 | ns |
| hsa-miR-150  | MIMAT0000451 | -0.173 | 0.1322 | 0.5083 | ns |
| hsa-miR-29a  | MIMAT0000086 | -0.171 | 0.1333 | 0.5269 | ns |
| hsa-miR-222  | MIMAT0000279 | -0.164 | 0.0358 | 0.5981 | ns |
| hsa-miR-98   | MIMAT0000096 | -0.161 | 0.0807 | 0.6303 | ns |
| hsa-miR-18a  | MIMAT0000072 | -0.158 | 0.046  | 0.6677 | ns |
| hsa-miR-181b | MIMAT0000257 | -0.143 | 0.1663 | 0.8227 | ns |
| hsa-miR-27a  | MIMAT0000084 | -0.139 | 0.1611 | 0.8586 | ns |
| hsa-miR-301a | MIMAT0000688 | -0.132 | 0.1036 | 0.9086 | ns |
| hsa-miR-130a | MIMAT0000425 | -0.127 | 0.0528 | 0.9394 | ns |
| hsa-miR-206  | MIMAT0000462 | -0.126 | 0.1139 | 0.9474 | ns |
| hsa-let-7e   | MIMAT0000066 | -0.119 | 0.1312 | 0.9705 | ns |
| hsa-miR-127  | MIMAT0004604 | -0.117 | 0.2329 | 0.9794 | ns |
| hsa-miR-205  | MIMAT0000266 | -0.114 | 0.113  | 0.9807 | ns |
| hsa-miR-23b  | MIMAT0000418 | -0.113 | 0.0235 | 0.9812 | ns |
| hsa-miR-19a  | MIMAT0000073 | -0.112 | 0.1182 | 0.982  | ns |
| hsa-miR-212  | MIMAT0000269 | -0.106 | 0.1397 | 0.9843 | ns |

|              |              |        |        |          |    |
|--------------|--------------|--------|--------|----------|----|
| hsa-miR-34a  | MIMAT0000255 | -0.089 | 0.2004 | 0.9983   | ns |
| hsa-miR-126  | MIMAT0000445 | -0.078 | 0.1309 | 0.9986   | ns |
| hsa-miR-193b | MIMAT0002819 | -0.072 | 0.1828 | 0.9988   | ns |
| hsa-miR-16   | MIMAT0000069 | -0.067 | 0.0803 | 0.9989   | ns |
| hsa-miR-100  | MIMAT0000098 | -0.059 | 0.0657 | 0.999    | ns |
| hsa-miR-135b | MIMAT0000758 | -0.059 | 0.0515 | 0.999    | ns |
| hsa-miR-193a | MIMAT0004614 | -0.057 | 0.0549 | 0.9991   | ns |
| hsa-miR-146b | MIMAT0002809 | -0.051 | 0.1313 | 0.9992   | ns |
| hsa-miR-125a | MIMAT0000443 | -0.042 | 0.088  | 0.9994   | ns |
| hsa-miR-181d | MIMAT0002821 | -0.035 | 0.1467 | 0.9995   | ns |
| hsa-miR-7    | MIMAT0000252 | -0.031 | 0.0815 | 0.9996   | ns |
| hsa-let-7f   | MIMAT0000067 | -0.029 | 0.1111 | 0.9996   | ns |
| hsa-miR-96   | MIMAT0000095 | -0.024 | 0.1182 | 0.9997   | ns |
| hsa-let-7d   | MIMAT0000065 | -0.013 | 0.0577 | 0.9999   | ns |
| hsa-miR-373  | MIMAT0000726 | -0.002 | 0.0811 | > 0.9999 | ns |
| hsa-miR-183  | MIMAT0000261 | 0.0092 | 0.1278 | 0.9998   | ns |
| hsa-miR-378  | MIMAT0000732 | 0.0094 | 0.0893 | 0.9998   | ns |
| hsa-let-7a   | MIMAT0000062 | 0.0112 | 0.1743 | 0.9997   | ns |
| hsa-miR-203  | MIMAT0000264 | 0.0438 | 0.1135 | 0.9991   | ns |
| hsa-let-7c   | MIMAT0000064 | 0.0536 | 0.1421 | 0.999    | ns |
| hsa-miR-200c | MIMAT0000617 | 0.0546 | 0.1715 | 0.999    | ns |

|              |              |        |        |        |    |
|--------------|--------------|--------|--------|--------|----|
| hsa-miR-29b  | MIMAT0000100 | 0.0596 | 0.0889 | 0.9988 | ns |
| hsa-miR-10a  | MIMAT0000253 | 0.072  | 0.1945 | 0.9985 | ns |
| hsa-miR-146a | MIMAT0000449 | 0.0773 | 0.1303 | 0.9983 | ns |
| hsa-miR-199a | MIMAT0000232 | 0.1012 | 0.0518 | 0.9824 | ns |
| hsa-miR-181c | MIMAT0000258 | 0.167  | 0.1058 | 0.4707 | ns |
| hsa-miR-124  | MIMAT0000422 | 0.2023 | 0.0932 | 0.1954 | ns |
| hsa-miR-20b  | MIMAT0001413 | 0.2176 | 0.0801 | 0.1232 | ns |
| hsa-miR-27b  | MIMAT0000419 | 0.2827 | 0.1402 | 0.0107 | *  |
| hsa-miR-148b | MIMAT0000759 | 0.3025 | 0.0726 | 0.0043 | ** |
| hsa-miR-181a | MIMAT0000256 | 0.3268 | 0.0741 | 0.0014 | ** |

\*\*\*\*,  $P \leq 0.0001$ ; \*\*\*,  $P \leq 0.001$ ; \*\*,  $P \leq 0.01$ ; \*,  $P \leq 0.05$ ; ns,  $P > 0.05$

**Supplementary Table S2. List of primers used.**

| Primer name                          | Sequence (5' to 3')                              | Type       | Use                                                                    |
|--------------------------------------|--------------------------------------------------|------------|------------------------------------------------------------------------|
| SpeI-3xFlag fwd                      | ATA <u>CTA GTC</u> CAC CAT GGA CTA CAA<br>AGA CC | Cloning    | Subcloned 3xFlag-Nurr1 into pSIN<br>lenti expression plasmid           |
| BamHI-Nurr1 rev                      | ATG <u>GAT CCC</u> TAG AAA GGT AAA GTG<br>TCC A  | Cloning    | Subcloned 3xFlag-Nurr1 into pSIN<br>lenti expression plasmid           |
| EF1a fwd seq                         | TCA AGC CTC AGA CAG TGG TTC                      | Sequencing | Confirm cloning of 3xFlag-Nurr1 into<br>pSIN plasmid                   |
| pSIN rev seq                         | CCC TAG ATG CAT GCG GAT CCT TCG                  | Sequencing | Confirm cloning of 3xFlag-Nurr1 into<br>pSIN plasmid                   |
| pEZX-MT01 fwd                        | GAT CCG CGA GAT CCT GAT                          | Sequencing | Confirm seed region mutation                                           |
| pEZX-MT01 rev                        | TTG GCG TTA CTA TGG GAA CAT                      | Sequencing | Confirm seed region mutation                                           |
| CDKN1A -3969 bp<br>RE fwd (p53-free) | ACT ATA TGC TCA GCC ATT GTG TCT GCT              | ChIP qPCR  | p53 ChIP of p53-free region in<br><i>CDKN1A</i> promoter <sup>38</sup> |
| CDKN1A -3969 bp<br>RE rev (p53-free) | CCC TCA GCA TCA GTG TTA CCA ACC                  | ChIP qPCR  | p53 ChIP of p53-free region in<br><i>CDKN1A</i> promoter <sup>38</sup> |
| CDKN1A -2242 bp<br>RE fwd            | CTG TGG CTC TGA TTG GCT TT                       | ChIP qPCR  | p53 ChIP of <i>CDKN1A</i> promoter <sup>38</sup>                       |
| CDKN1A -2242 bp<br>RE rev            | CCC TTC CTC ACC TGA AAA CA                       | ChIP qPCR  | p53 ChIP of <i>CDKN1A</i> promoter <sup>38</sup>                       |
| CDKN1A -11708 bp<br>RE fwd           | GAG TGG GTG GCT CAC TCT TC                       | ChIP qPCR  | p53 ChIP of <i>CDKN1A</i> promoter <sup>38</sup>                       |
| CDKN1A -11708 bp<br>RE rev           | CTC GCA TCA GCA ACT CTG G                        | ChIP qPCR  | p53 ChIP of <i>CDKN1A</i> promoter <sup>38</sup>                       |
| MDM2 p53 RE fwd                      | GAT TGG GCC GGT TCA GTG G                        | ChIP qPCR  | p53 ChIP of <i>MDM2</i> promoter <sup>39</sup>                         |
| MDM2 p53 RE rev                      | CAC AGC TGG GAA AAT GCA TGG                      | ChIP qPCR  | p53 ChIP of <i>MDM2</i> promoter <sup>39</sup>                         |
| mir-34a p53 RE fwd                   | ACG CTT GTG TTT CTC AGT CCG                      | ChIP qPCR  | p53 ChIP of <i>mir-34a</i> promoter <sup>20</sup>                      |
| mir-34a p53 RE rev                   | TGG TCT AGT TCC CGC CTC CT                       | ChIP qPCR  | p53 ChIP of <i>mir-34a</i> promoter <sup>20</sup>                      |

**a.**

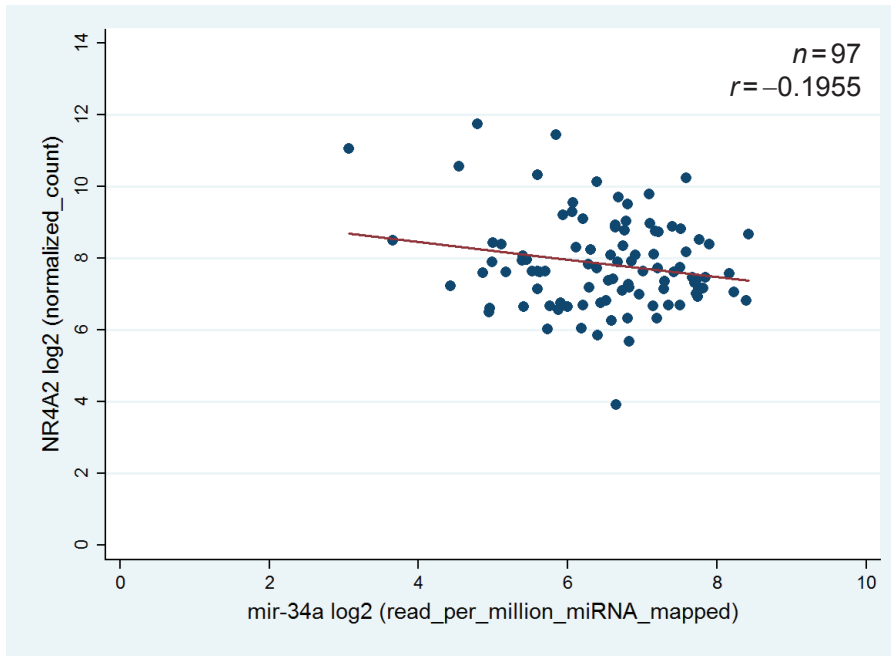

**b.**

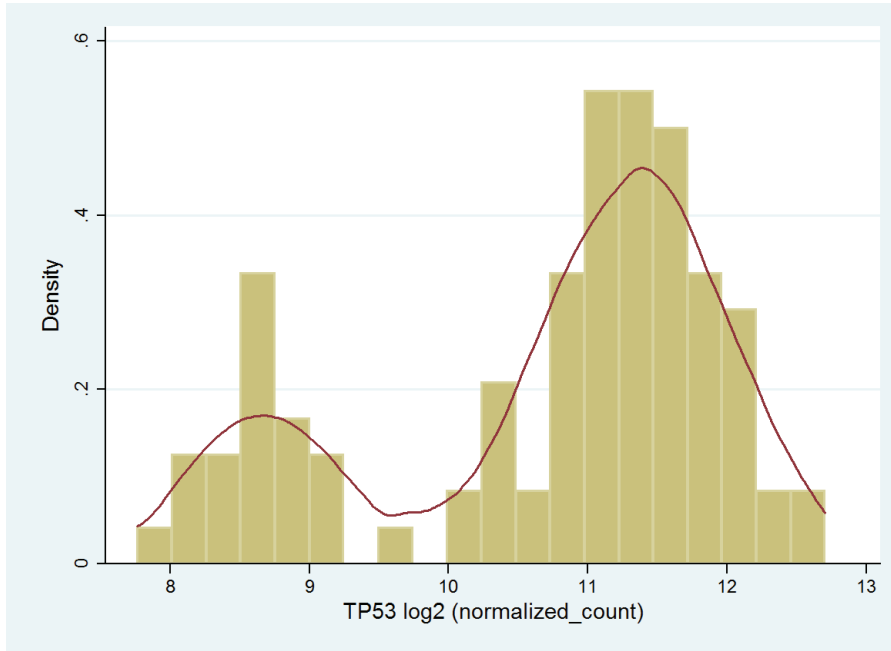

**c.**

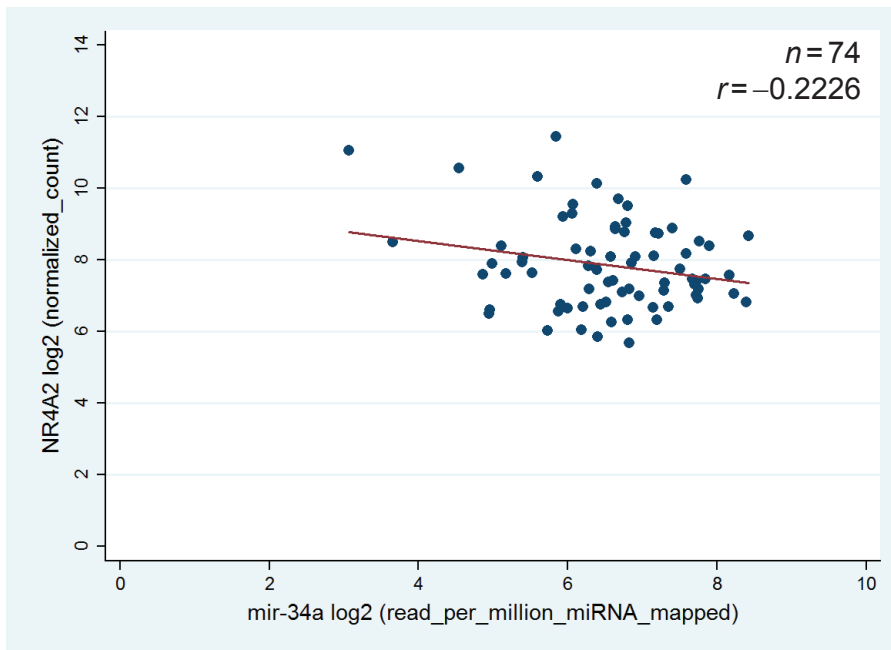

**a.**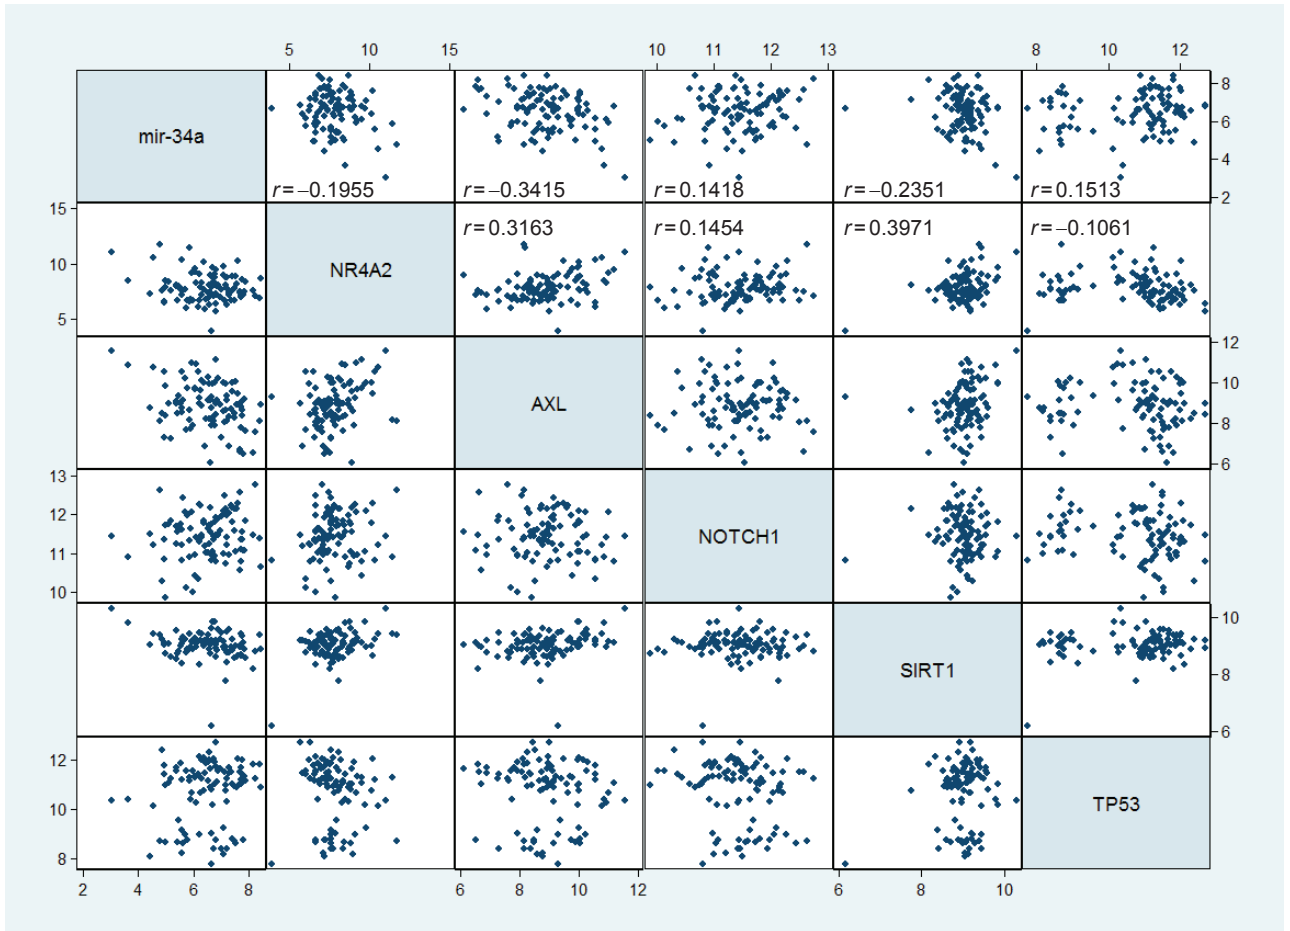**b.**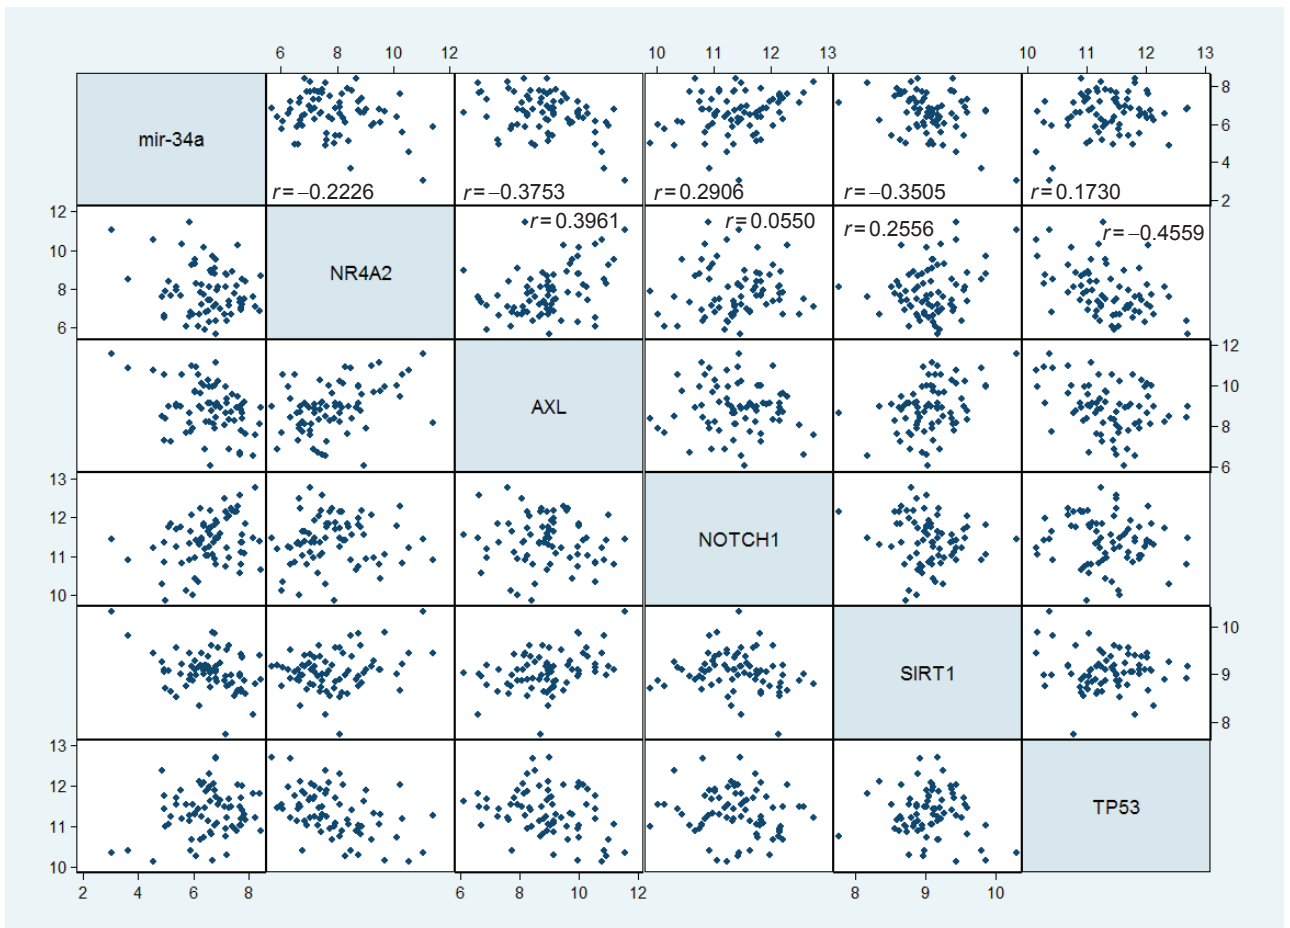



**a.**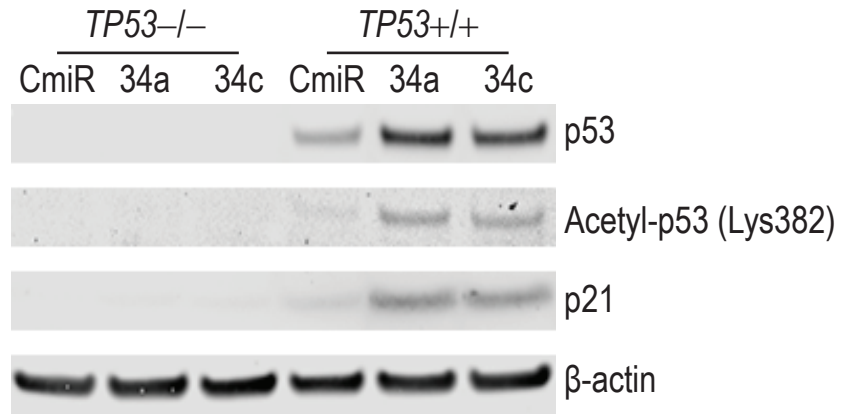**b.**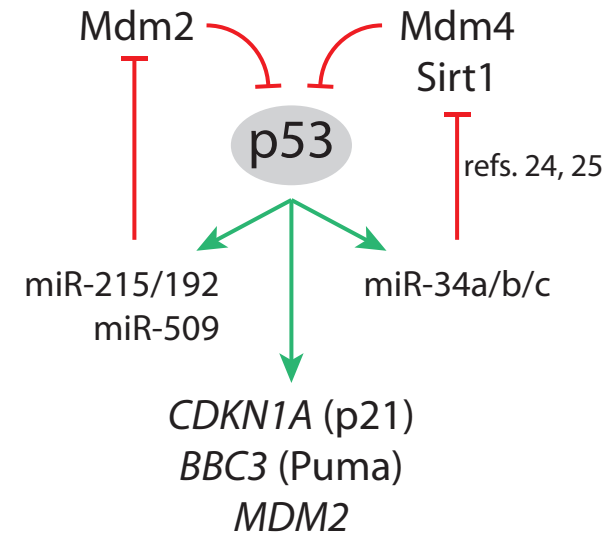**c.**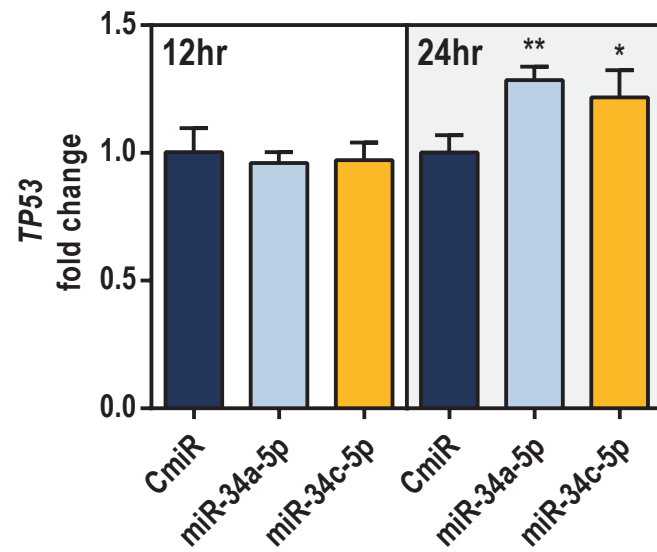**d.**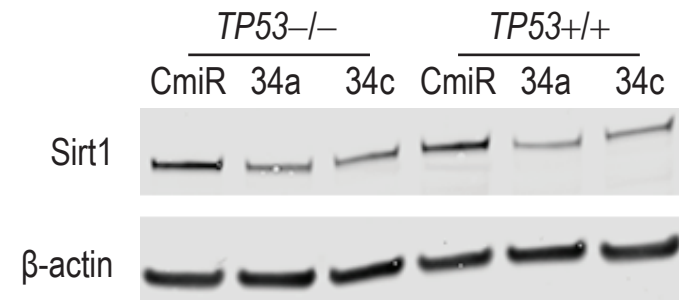

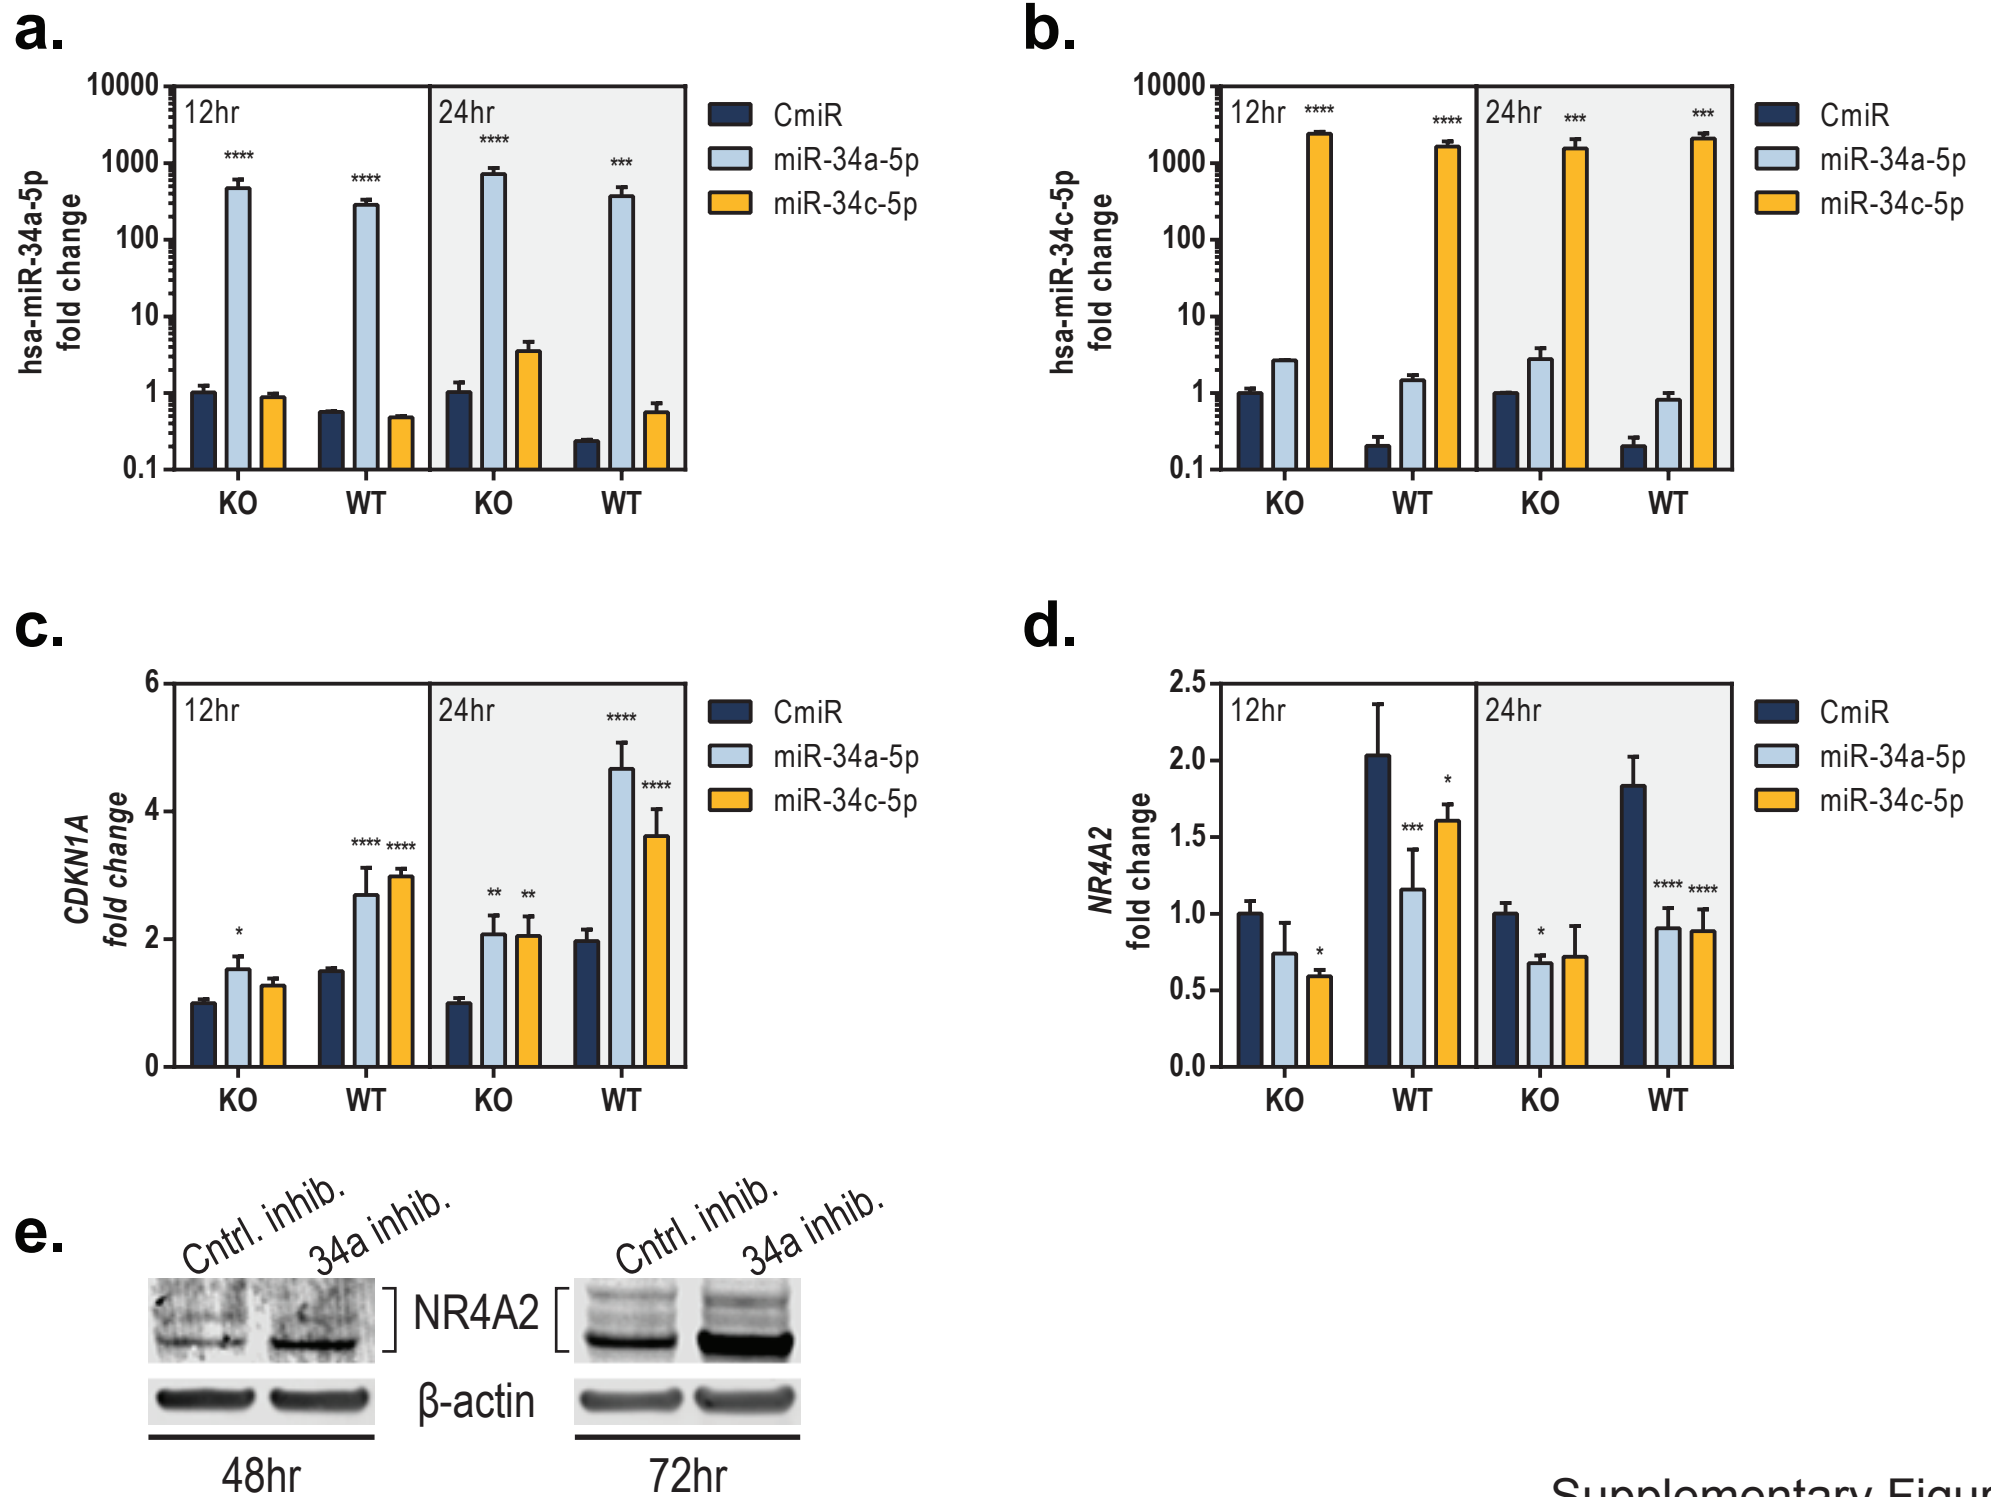

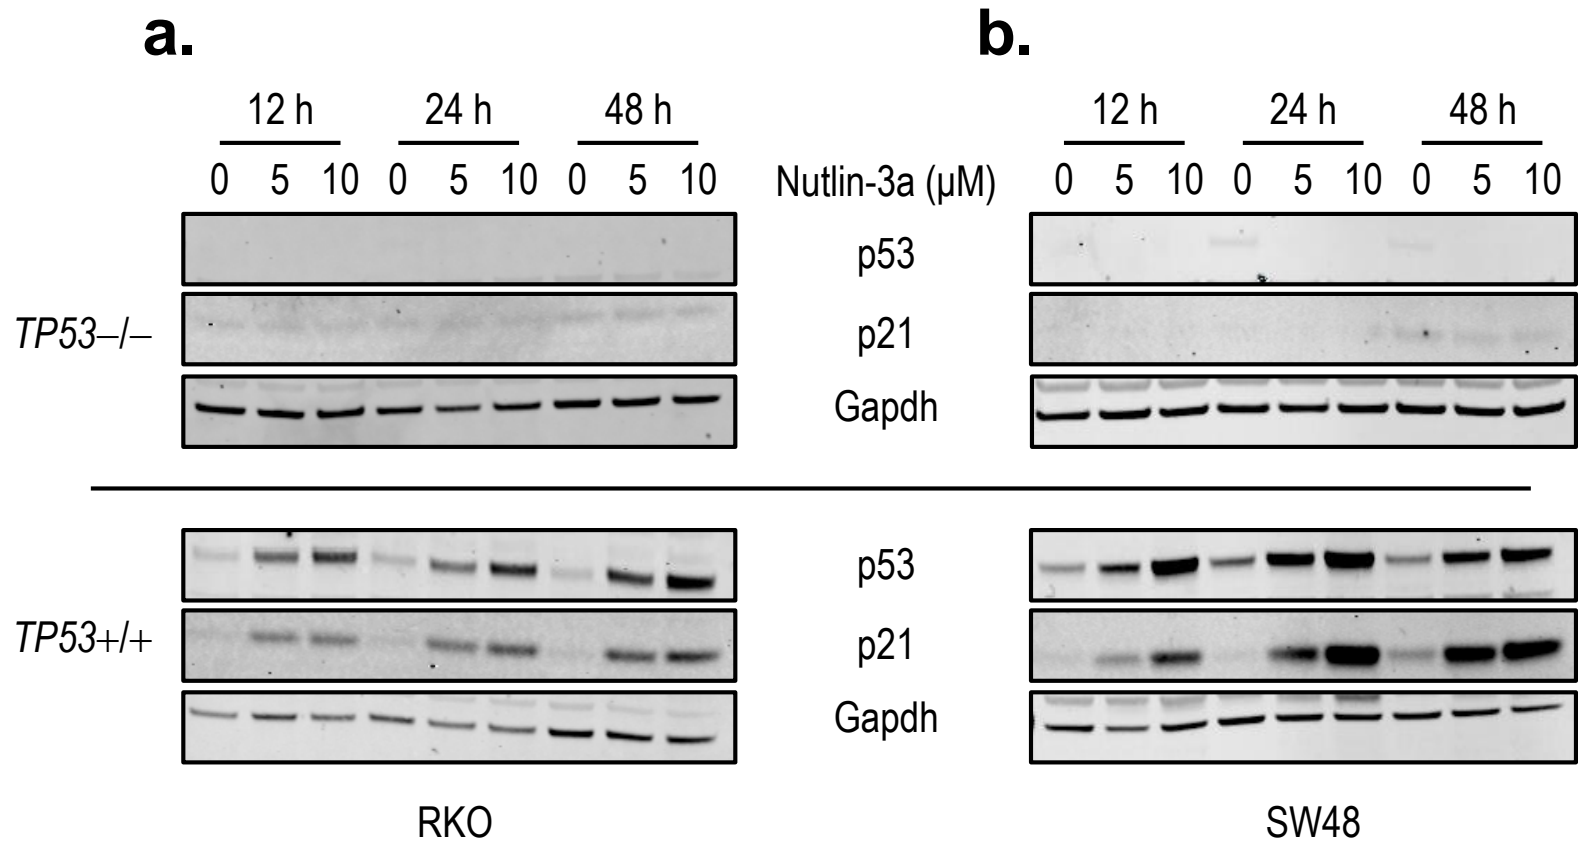

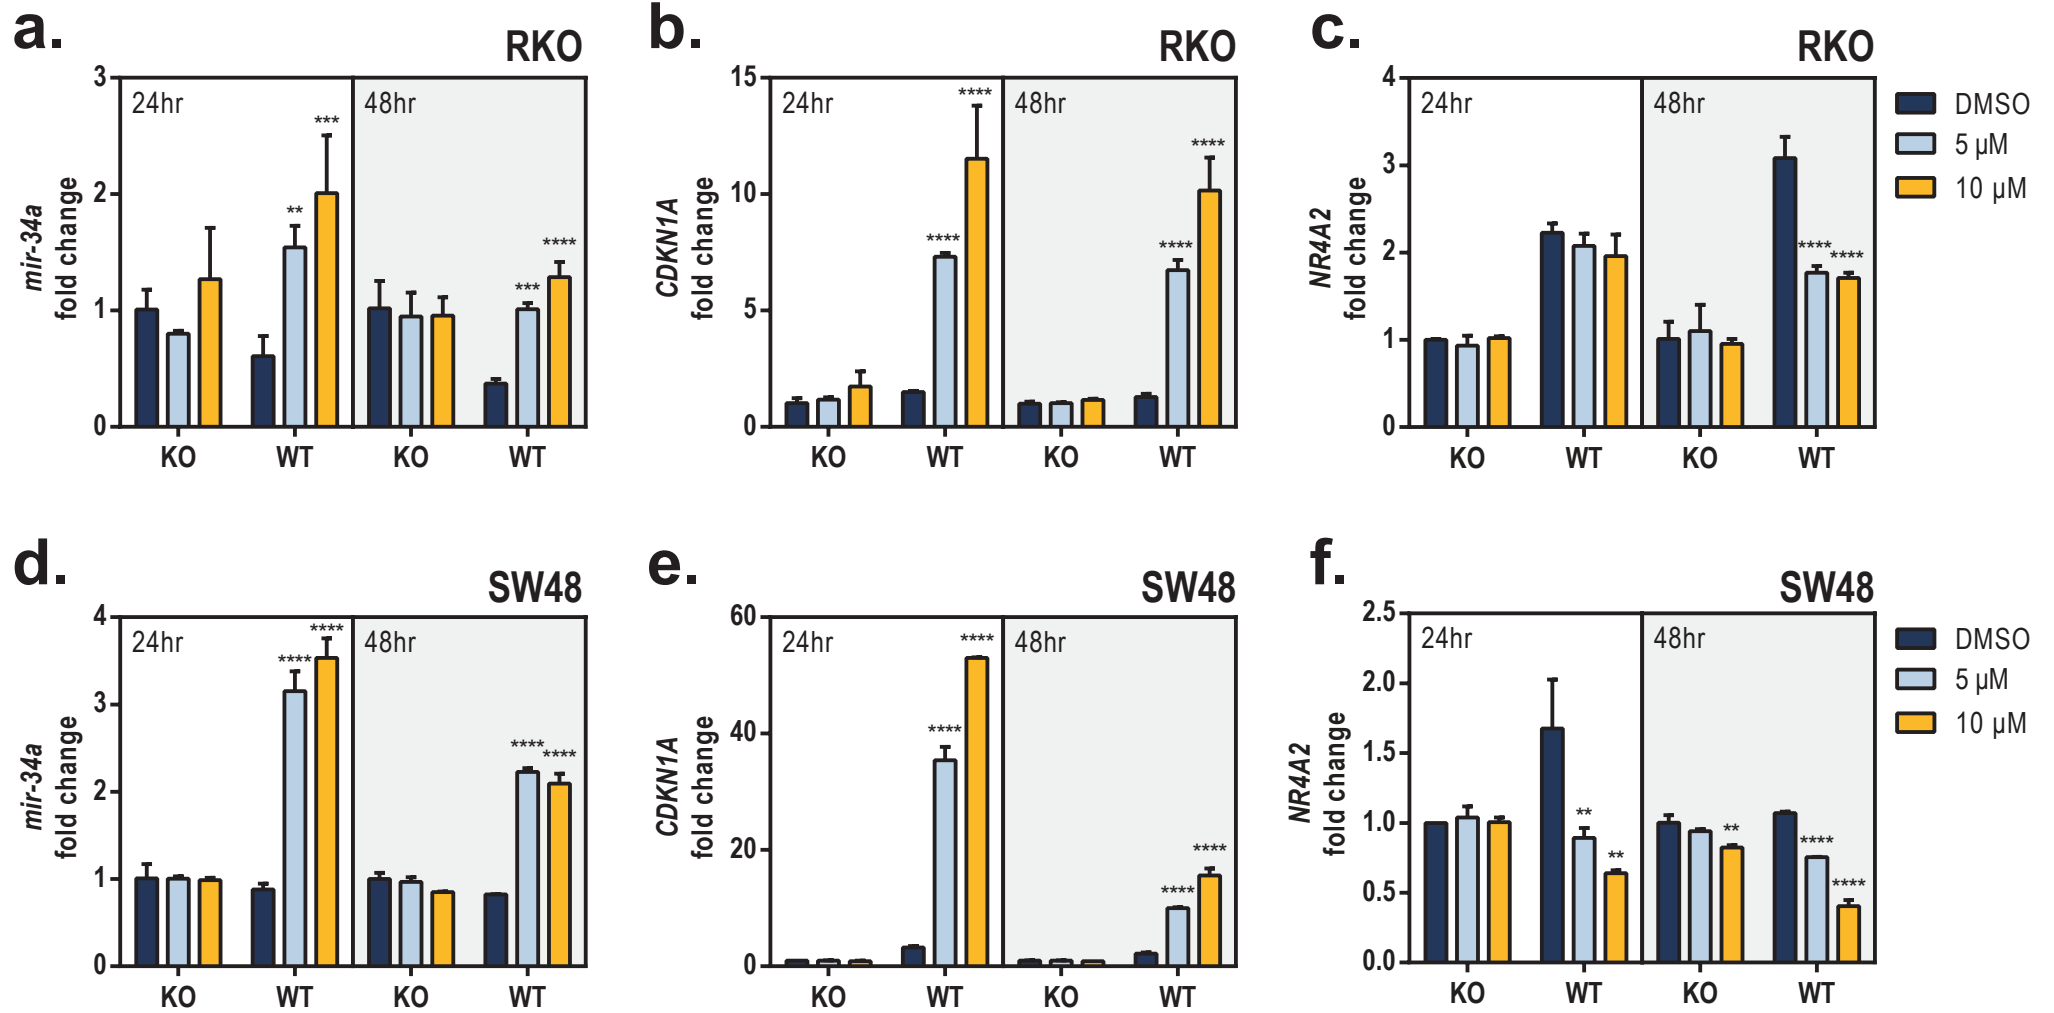

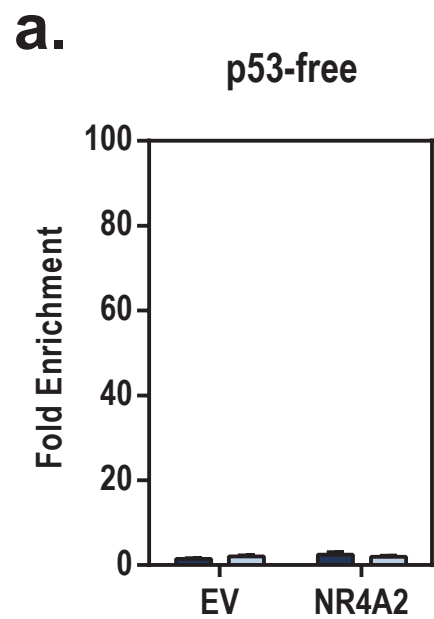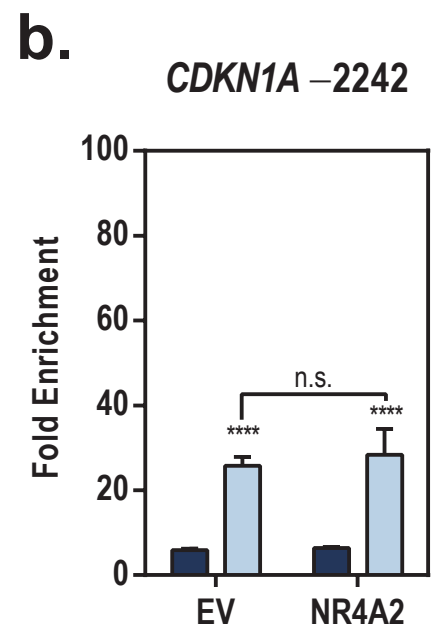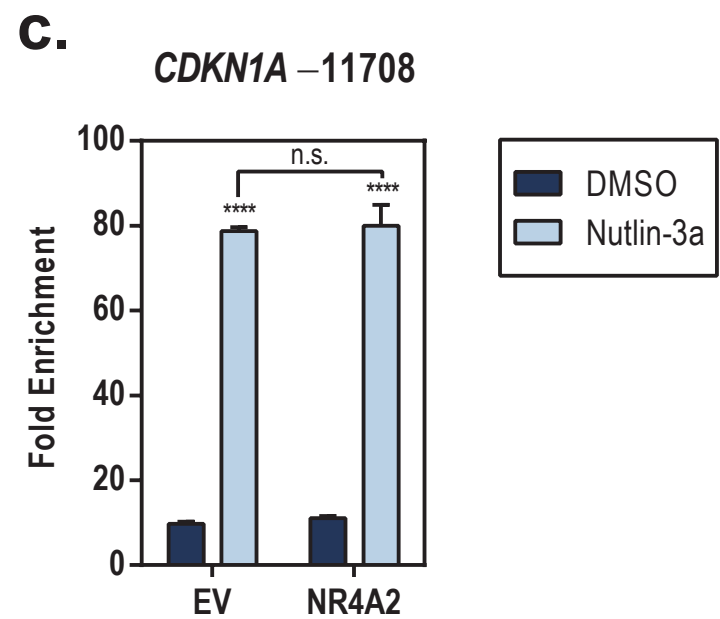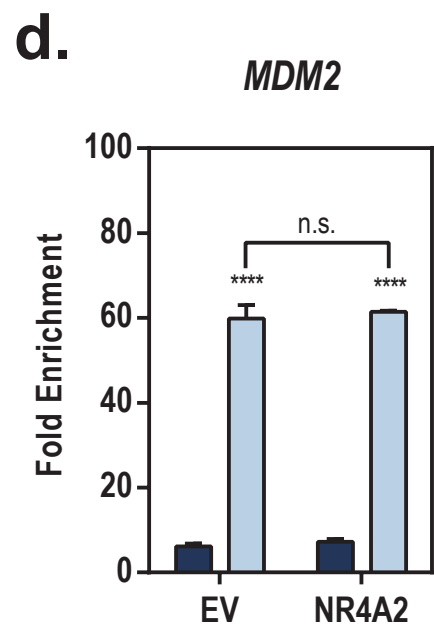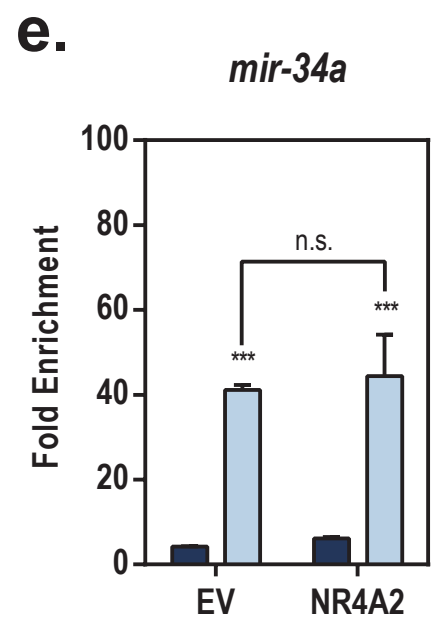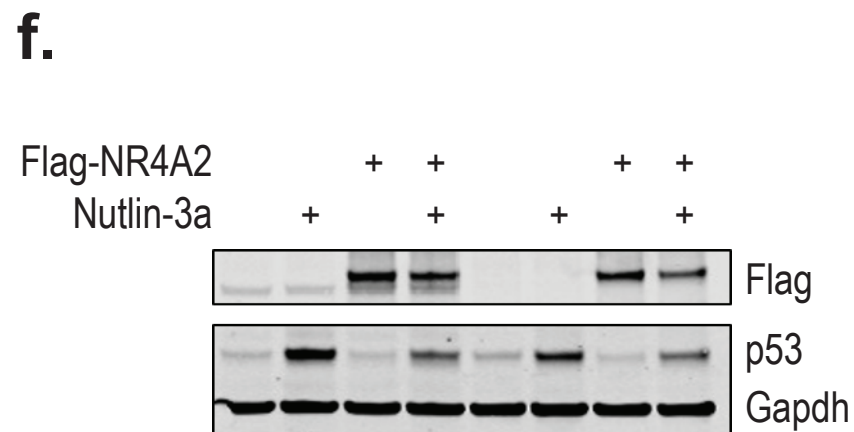

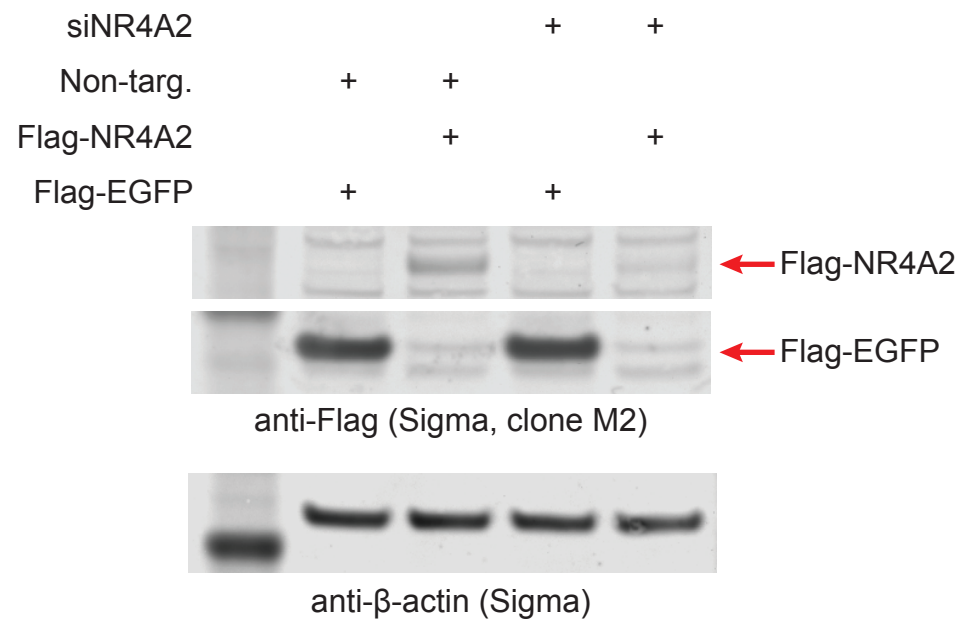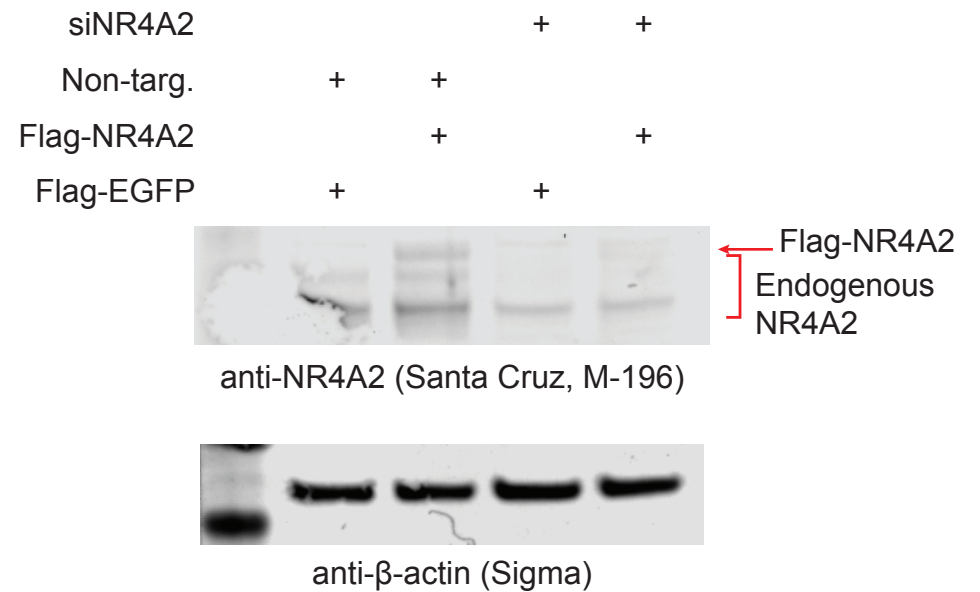

Supplementary Figure S8

## Supplementary Legends

**Supplementary Table S1. List of miRNAs screened.** The log<sub>2</sub> fold changes from the reporter assay screen of all the miRNAs screened are listed by miRNA ID and mirBase Accession Number. The significance of each miRNA in comparison to the transfection control (pSIF) was determined using a one-way ANOVA and Dunnett's test for multiple comparisons. \*\*\*\*,  $P \leq 0.0001$ ; \*\*\*,  $P \leq 0.001$ ; \*\*,  $P \leq 0.01$ ; \*,  $P \leq 0.05$ ; ns,  $P > 0.05$ .

**Supplementary Table S2. List of primers used.** The name, sequence, and use of each primer.

### Supplementary Figure S1. Correlation of miR-34a and NR4A2 expression in rectum

**adenocarcinoma patients.** (a) Regression analysis was used to determine the correlation between expression of miR-34a and NR4A2 in a subset of 97 patient samples from the TCGA rectum adenocarcinoma dataset. (b) TP53 expression was determined using HiSeq data from the 97 patient samples and the distribution of expression is represented. (c) Regression analysis was used to determine the correlation between expression of miR-34a and NR4A2 in a smaller subset of 74 patient samples with higher TP53 expression.

### Supplementary Figure S2. miR-34a correlation matrix in rectum adenocarcinoma patients.

(a) Expression correlations between miR-34a and indicated genes were determined using regression analysis in a subset of 97 patient samples from the TCGA rectum adenocarcinoma dataset. (b) Regression analysis was used to determine the correlation between expression of miR-34a and indicated genes in a smaller subset of 74 patient samples with higher TP53 expression.

**Supplementary Figure S3. Overexpression of miR-34 increases p53 protein and acetylation**

**levels.** (a) Control (labeled as CmiR) or miR-34a-5p (34a) or miR-34c-5p (34c) mimics (10 nM) were transfected into HCT116 isogenic cell lines for 48 h, after which SDS-PAGE gel electrophoresis and Western blot analysis of the indicated proteins from whole cell lysates (45  $\mu$ g) was performed. (b) A schematic of the previously described positive-feedback mechanisms involving p53 and its transcriptionally regulated miRNAs. (c) Expression of *TP53* was determined using a TaqMan qPCR probe after transfection of control (CmiR), miR-34a-5p, or miR-34c-5p mimics (10 nM) into HCT116 wild-type (WT) cells for the times indicated. Gene expression was normalized to *GAPDH*. The value for the CmiR-transfected WT cells at each time point was set as 1. The statistical significance of the results for miR-34 transfections, compared to those for the control, at each time point was calculated using a one-way ANOVA and Dunnett's test for multiple comparisons.\*\*,  $P \leq 0.01$ ; \*,  $P \leq 0.05$ . (d) Whole-cell lysates (45  $\mu$ g) from HCT116<sup>*TP53*<sup>-/-</sup></sup> (*TP53*<sup>-/-</sup>) and HCT116 wild-type (*TP53*<sup>+/+</sup>) cells transfected for 48 h with CmiR, miR-34a-5p (34a), or miR-34c-5p (34c) mimics were assessed for expression of Sirt1 and  $\beta$ -actin protein by performing SDS-PAGE gel electrophoresis and Western blot analysis.

**Supplementary Figure S4. Overexpression of miR-34 decreases NR4A2 in RKO colorectal**

**cancer cells.** Mature miR-34a-5p and miR-34c-5p mimics (10 nM) were transfected into RKO<sup>*TP53*<sup>-/-</sup></sup> (KO) or RKO wild-type (WT) cells for 12 or 24 h. Expression of hsa-miR-34a-5p (a), hsa-miR-34c-5p (b), *CDKN1A* (c), and *NR4A2* (d) was determined using TaqMan qPCR probes. Mature miRNA expression was normalized to *RNU48*, and *CDKN1A* and *NR4A2* were normalized to *GAPDH*. The value for the CmiR-transfected KO cells at each time point was set



as 1. The statistical significance of the results for miR-34 transfections for each cell line, compared to those for the control, at each time point was calculated using a two-way ANOVA and Dunnett's test for multiple comparisons. \*\*\*\*,  $P \leq 0.0001$ ; \*\*\*,  $P \leq 0.001$ ; \*\*,  $P \leq 0.01$ ; \*,  $P \leq 0.05$ . (e) RKO WT cells were transfected with control or miR-34a inhibitor for indicated time points. Total protein lysates from 48hr (45  $\mu$ g) or 72hr (70  $\mu$ g) samples were assessed for expression of NR4A2.

**Supplementary Figure S5. Nutlin-3a enhances p53 and p21 protein levels in RKO and SW48 colorectal cancer cell lines.** RKO (a) and SW48 (b) colorectal cancer cell lines that are isogenic for p53 expression ( $TP53^{-/-}$ , top;  $TP53^{+/+}$ , bottom) were treated for the indicated time periods with vehicle (DMSO) (0  $\mu$ M) or Nutlin-3a (5 or 10  $\mu$ M). Whole-cell lysates were assessed for expression of p53, p21, and Gapdh protein by performing SDS-PAGE gel electrophoresis.

**Supplementary Figure S6. p53 activation by Nutlin-3a decreases NR4A2 in RKO and SW48 cell lines.** RKO<sup>*TP53*<sup>-/-</sup></sup> (KO) and RKO wild-type (WT) (a–c) or SW48<sup>*TP53*<sup>-/-</sup></sup> (KO) and SW48 wild-type (WT) cells (d–f) were treated with vehicle control (DMSO) or Nutlin-3a (5 or 10  $\mu$ M) for 24 or 48 h. Expression of *mir-34a* (a, d), *CDKN1A* (b, e), and *NR4A2* (c, f) was determined using TaqMan qPCR probes (normalized to *GAPDH*). The value for the DMSO-treated KO cells at each time point was set as 1. The statistical significance of the results obtained with Nutlin-3a treatments for each cell line, compared to those obtained with DMSO, for each time point was calculated using a two-way ANOVA and Dunnett's test for multiple comparisons. \*\*\*\*,  $P \leq 0.0001$ ; \*\*\*,  $P \leq 0.001$ ; \*\*,  $P \leq 0.01$ .

**Supplementary Figure S7. Overexpression of NR4A2 does not affect binding of p53 to target gene promoters.** HCT116 wild-type cells were transduced with empty vector (EV) or 3xFlag-NR4A2 (NR4A2) lentivirus. After 16 h, the medium was changed and the cells were grown in culture for a total of 48 h. The cells were then reseeded into 150-mm<sup>2</sup> flasks and treated for 6 h with vehicle (DMSO) or Nutlin-3a (10 μM). The chromatin immunoprecipitation protocol was performed and the occupancy of p53 at the p53-free (a), *CDKN1A* -2242 (b), *CDKN1A* -11708 (c), *MDM2* (d), and *mir-34a* (e) promoter regions is shown (represented as fold-enrichment over IgG). (f) Nuclear-enriched extracts used as input for the ChIP were resolved on a 4–12% SDS-PAGE gradient gel and probed with antibodies against Flag (indicating NR4A2), p53, and Gapdh. The statistical significance of the results was determined using a two-way ANOVA with Tukey's multiple comparison test. The significance of the differences within each transduction group (\*\*\*\*,  $P \leq 0.0001$ ; \*\*\*,  $P \leq 0.001$ ) and between transduction groups (n.s.,  $P > 0.05$ ) is represented.

**Supplementary Figure S8. Validation of an anti-NR4A2 antibody.** HCT116<sup>TP53<sup>-/-</sup></sup> cells were transfected with nontargeting siRNA (Non-Targ.) or siNR4A2 (20 nM) in 60mm<sup>2</sup> dishes. After 24 h of siRNA transfection, 3xFlag-EGFP (Flag-EGFP) or 3xFlag-NR4A2 (Flag-NR4A2) were transfected for an additional 48 h. Whole cell lysates (45 μg) were resolved on a 4–12% SDS-PAGE gradient gel and transferred to PVDF membrane using wet transfer (100V constant for 1 h). Membranes were probed with antibodies against Flag (detecting overexpressed NR4A2 or EGFP), NR4A2 (detecting both endogenous NR4A2 and Flag-NR4A2), and β-actin. The levels

of endogenous NR4A2 (detected using anti-NR4A2) and Flag-NR4A2 (detected using either anti-NR4A2 or anti-Flag) decreased in response to siNR4A2 but not Non-Targ.
